1        **Activation of RIG-I-mediated antiviral signaling triggers autophagy through the**  
2        **MAVS-TRAF6-Beclin-1 signaling axis**

3  
4        Na-Rae Lee,<sup>a</sup> Junsu Ban,<sup>a</sup> Noh-Jin Lee,<sup>a</sup> Chae-Min Yi,<sup>a</sup> Jiyeon Choi,<sup>a</sup> Hyunbin Kim,<sup>b,c</sup> Jong-  
5        Kil Lee,<sup>a</sup> Jihye Seong,<sup>b,c</sup> Nam-Hyuk Cho,<sup>d,e</sup> Jae U. Jung,<sup>f</sup> Kyung-Soo Inn<sup>a,b</sup> #

6  
7        <sup>a</sup>Department of Fundamental Pharmaceutical Sciences, Graduate School, Kyung Hee  
8        University, Seoul, Republic of Korea

9        <sup>b</sup>KHU-KIST Department of Converging Science and Technology, Graduate School, Kyung  
10        Hee University, Seoul, Republic of Korea

11        <sup>c</sup>Convergence Research Center for Diagnosis, Treatment and Care System of Dementia,  
12        Korea Institute of Science and Technology (KIST), Seoul, Republic of Korea

13        <sup>b</sup>Department of Biomedical Sciences, Seoul National University College of Medicine, Seoul,  
14        Republic of Korea

15        <sup>c</sup>Department of Microbiology and Immunology, Seoul National University College of  
16        Medicine, Seoul, Republic of Korea

17        <sup>f</sup>Department of Molecular Microbiology and Immunology, Keck School of Medicine,  
18        University of Southern California, Los Angeles, California, United States of America

19  
20        Running Head: TRAF6-dependent autophagy induction by RIG-I signaling

21        #Address correspondence to Kyung-Soo Inn, innks@khu.ac.kr

22

23

24 **Abstract**

25 Autophagy has been implicated in innate immune responses against various intracellular  
26 pathogens. Recent studies have reported that autophagy can be triggered by pathogen  
27 recognizing sensors, including Toll-like receptors and cyclic guanosine monophosphate-  
28 adenosine monophosphate synthase, to participate in innate immunity. In the present study,  
29 we examined whether the RIG-I signaling pathway, which detects viral infections by  
30 recognizing viral RNA, triggers the autophagic process. The introduction of polyI:C into the  
31 cytoplasm, or Sendai virus infection, significantly induced autophagy in normal cells but not  
32 in RIG-I-deficient cells. PolyI:C transfection or Sendai virus infection induced autophagy in  
33 the cells lacking type-I interferon signaling. This demonstrated that the effect was not due to  
34 interferon signaling. RIG-I-mediated autophagy diminished by the deficiency of  
35 mitochondrial antiviral signaling protein (MAVS) or tumor necrosis factor receptor-  
36 associated factor (TRAF)6, showing that the RIG-I-MAVS-TRAF6 signaling axis was  
37 critical for RIG-I-mediated autophagy. We also found that Beclin-1 was translocated to the  
38 mitochondria, and it interacted with TRAF6 upon RIG-I activation. Furthermore, Beclin-1  
39 underwent K63-polyubiquitination upon RIG-I activation, and the ubiquitination decreased  
40 in TRAF6-deficient cells. This suggests that the RIG-I-MAVS-TRAF6 axis induced K63-  
41 linked polyubiquitination of Beclin-1, which has been implicated in triggering autophagy.  
42 Collectively, the results of this study show that the recognition of viral infection by RIG-I is  
43 capable of inducing autophagy to control viral replication. As deficient autophagy increases

44 the type-I interferon response, the induction of autophagy by the RIG-I pathway might also  
45 contribute to preventing an excessive interferon response as a negative-feedback mechanism.

46

## 47 **Importance**

48 Mammalian cells utilize various innate immune sensors to detect pathogens. Among those  
49 sensors, RIG-I recognizes viral RNA to detect intracellular viral replication. Although cells  
50 experience diverse physiological changes upon viral infection, studies to understand the role  
51 of RIG-I signaling have focused on the induction of type-I interferon. Autophagy is a process  
52 that sequesters cytosolic regions and degrades the contents to maintain cellular homeostasis.  
53 Autophagy participates in the immune system, and has been known to be triggered by some  
54 innate immune sensors, such as TLR4 and cGAS. We demonstrated that autophagy can be  
55 triggered by the activation of RIG-I. In addition, we also proved that MAVS-TRAF6  
56 downstream signaling is crucial for the process. Beclin-1, a key molecule in autophagy, is  
57 translocated to mitochondria, where it undergoes K63-ubiquitination in a TRAF6-dependent  
58 manner upon RIG-I activation. As autophagy negatively regulates RIG-I-mediated signaling,  
59 the RIG-I-mediated activation of autophagy may function as a negative-feedback mechanism.

60

## 61 **Introduction**

62 Autophagy is a process that sequesters cytosolic regions and delivers their contents to the  
63 lysosomes for subsequent degradation. Both extracellular stimuli, such as starvation and  
64 hypoxia, and intracellular stresses, including the accumulation of damaged organelles,  
65 induce autophagy to degrade long-lived proteins and damaged organelles in order to recycle

66 and maintain cell homeostasis (1). As autophagy is triggered by infection with intracellular  
67 pathogens, such as bacteria and viruses, it is recognized as part of the innate immune system  
68 to control and eliminate infections by engulfing and degrading intracellular pathogens (i.e.,  
69 xenophagy) (2-4). Recent extensive studies have revealed that several autophagic adaptors,  
70 such as sequestosome 1 (SQSTM1/p62), optineurin, and nuclear dot protein 52 kDa,  
71 specifically recognize the intracellular presence of bacteria, including *Salmonella*, *Shigella*,  
72 *Listeria*, and *Mycobacteria*, and induce autophagy (5-8). Adaptor proteins, referred to as  
73 sequestosome 1/p62-like receptors (SLRs), directly recognize ubiquitinated microbes as their  
74 targets to induce autophagy. They are now regarded as a class of pattern recognition  
75 receptors of the innate immune system (9).

76 Besides the SLRs, the innate immune system utilizes a limited number of sensors including  
77 Toll-like receptors (TLRs), Nod-like receptors, cyclic guanosine monophosphate-adenosine  
78 monophosphate synthase (cGAS), and RIG-I-like receptors (RLRs) to detect various  
79 pathogen-associated molecular patterns (10-14). Among these sensors, RIG-I and MDA5  
80 recognize viral RNAs to mount an antiviral immune response. Upon recognition, RIG-I and  
81 MDA5 translocate to mitochondria to interact with the mitochondrial antiviral signaling  
82 protein (MAVS)/IPS-1/Cardif, a downstream mitochondrial signaling protein. The  
83 subsequent recruitment of signaling molecules, including tumor necrosis factor receptor-  
84 associated factor (TRAF)3 and TRAF6, results in the activation of transcription factors, such  
85 as IRF3/7, NF- $\kappa$ B, and AP-1, leading to the production of type-I interferon.

86 As autophagy can be activated by infection with pathogens, it is conceivable that the innate  
87 immune sensors regulate the autophagic process upon recognition of pathogens. Indeed, the

88 activation of innate immune signaling pathways triggered by innate immune sensors, including  
89 TLR4 and cGAS, activates autophagy, indicating that the innate immune system modulates  
90 autophagy directly (15-17). Besides participating in the innate immune system by directly  
91 eliminating pathogens, autophagy also plays crucial roles in regulating this system to prevent  
92 excessive responses (18-20).

93 A recent study showed that the absence of autophagy amplified RIG-I signaling due to  
94 increased mitochondrial MAVS and reactive oxygen species from damaged mitochondria,  
95 implicating autophagy in RLR signaling (21). However, it has not been reported whether  
96 RIG-I-mediated antiviral signaling directly regulates autophagy. Herein, we show that the  
97 activation of RIG-I by its ligands provokes autophagy in a downstream MAVS-TRAF6  
98 signaling axis-dependent manner.

99

## 100 **Results**

101

### 102 **Activation of the RIG-I signaling pathway activates autophagy**

103 To investigate whether the recognition of viral RNA by RIG-I can trigger autophagy,  
104 HEK293T cells were transfected with the RIG-I agonist, polyI:C, a synthetic double-  
105 stranded RNA analogue, or infected with Sendai virus (SeV). Both polyI:C transfection and  
106 SeV infection increased the level of LC3-II, a lipidated form of LC3 (Fig. 1A). In both the  
107 experimental settings, the change was evident 2 h after stimulation (Fig. 1A). Increased  
108 formation of autophagic vesicles was also observed in the polyI:C-transfected and SeV-

109 infected cells compared with that in mock-infected cells, as determined by Cyto-ID that can  
110 stain both autophagosomes and autolysosomes specifically (22). The increased  
111 autophagosome formation by polyI:C transfection or SeV infection was further confirmed by  
112 transmission electron microscopy. As shown in Figure 1C, the number of dense black  
113 double-membrane structure vesicles increased in the polyI:C transfected or SeV infected  
114 cells. The formation of LC3 puncta by polyI:C or SeV infection also contributed to the  
115 modulation of autophagy by RIG-I signaling (Fig. 1D). Furthermore, the level of p62  
116 decreased in a time-dependent manner in the polyI:C-transfected or SeV-infected cells (Fig.  
117 1E). This indicated that the increased level of LC3-II was due to increased autophagy and  
118 not due to decreased phagolysosome formation.

119 The induction of autophagy by RIG-I activation was also observed in different types of cells.  
120 The transfection of polyI:C was resulted in increased LC3 lipidation and LC3 puncta  
121 formation in Raw264.7 murine monocytic cells (Figs. 2A and 2B). Consistently, increment  
122 of LC3 lipidation by polyI:C transfection or SeV infection was easily detected in N2a mouse  
123 neuroblastoma cells and BV-2 mouse microglial cells (Figs. 2C and 2D), suggesting that the  
124 induction of autophagy by RIG-I activation is not a cell- or species-specific phenomenon.

125 To further confirm that the triggering of autophagy by an RIG-I agonist was due to the  
126 activation of RIG-I signaling, the effect of expressing a constitutively active form of RIG-I  
127 on autophagy was examined. The ectopic expression of RIG-I-2Card (RIG-IN) or MDA5-  
128 2Card domains (MDA5-N) increased LC3 lipidation (Fig. 3A). The activation of RIG-I  
129 signaling by ectopic expression also increased autophagosomes, as determined by cyto-ID  
130 staining (Fig. 3B). The ectopic expression of RIG-IN or MDA5-N also increased LC3-functa

131 formation, indicating that both RIG-I and MDA5 can modulate autophagy (Fig. 3C). The  
132 level of p62 decreased in the RIG-IN-expressing cells in a time-dependent manner (Fig. 3D).  
133 Moreover, the inhibition of lysosomal degradation by the treatment with chloroquine (CQ)  
134 significantly increased the effect of RIG-IN on LC3 lipidation, confirming that the  
135 accumulation of LC3-II by RIG-I signaling was not due to the suppression of autophagy flux  
136 (Fig. 3E).

137 The induction of autophagy by polyI:C or SeV was examined in cells defective in type-I  
138 interferon signaling to test whether RIG-I-mediated autophagy was due to type-I interferon  
139 signaling induced by RIG-I signaling. The transfection of polyI:C triggered LC3 lipidation in  
140 type-I interferon receptor-deficient MEFs, suggesting that RIG-I signaling can induce  
141 autophagy flux in a type-I interferon-independent manner (Fig. 3F). Furthermore, polyI:C  
142 transfection or SeV infection also increased LC3-II in Vero cells, which are defective in  
143 interferon signaling (Fig. 3G).

144

145 **Autophagy induction by SeV infection or polyI:C transfection requires functional**  
146 **RIG-I**

147 The influence of RIG-I-mediated signaling on the induction of autophagy was further  
148 examined using cells deficient in RIG-I activity. We used Huh7.5 human hepatoma cells that  
149 were derived from Huh7 cells. These cells lose their RIG-I activity due to a mutation in RIG-  
150 I (T55I). As expected, LC3-II formation increased by the transfection of Huh7 but not by  
151 Huh7.5 cells with polyI:C (Fig. 4A). However, the infection of Huh7.5 cells with influenza  
152 A virus activated autophagy to a level comparable to Huh7 cells. This suggested that

153 influenza A virus triggered autophagy via other signaling pathways, such as TLR4, in the  
154 absence of RIG-I signaling (Fig. 4B). Consistent with the Huh7.5 data, RIG-I-deficient  
155 mouse embryonic fibroblasts (MEFs) also failed to exhibit increased autophagy upon  
156 polyI:C transfection or SeV infection, whereas, RIG-I wild-type (WT) MEFs successfully  
157 activated autophagy with both treatments (Figs. 4C and D).

158

### 159 **MAVS-TRAF6 signaling axis is required for RIG-I-mediated signaling**

160 The role of MAVS, a downstream mitochondrial signaling molecule, in inducing autophagy  
161 was investigated. The LC3-II level was increased by the ectopic expression of MAVS in  
162 HEK293T cells (Fig. 5A). However, the introduction of polyI:C into the MAVS-deficient  
163 MEFs failed to increase LC3 lipidation (Fig. 5B). Consistently, no significant increase in  
164 autophagosome formation was observed by electron microscopy in the MAVS-deficient  
165 MEFs upon transfection with polyI:C. In contrast, a significant increase in the number of  
166 autophagosomes was observed in WT MEFs (Fig. 5C). Furthermore, there was no significant  
167 decrease in p62 upon SeV infection in the cycloheximide-treated MAVS-deficient MEFs,  
168 whereas, a significant decrease in the p62 level was observed in the cycloheximide-treated  
169 WT MEFs (Fig. 5D). These results indicate that RIG-I or MDA5 induce autophagy flux via  
170 their downstream MAVS. Given that MAVS recruits TRAF6 to activate downstream  
171 signaling and TRAF6 activates TLR4-mediated autophagy, it is worth testing the hypothesis  
172 that TRAF6 plays a crucial role in RIG-I-mediated autophagy. Indeed, LC3-II formation  
173 following SeV infection or polyI:C transfection was significantly lower in TRAF6-deficient  
174 than in WT MEFs (Figs. 6A and B). Consistently, LC3 puncta formation by transfection with



175 polyI:C or RIG-IN was significantly lower in the TRAF6-defective MEFs than in the WT  
176 MEFs (Fig. 6C). In addition, there was a significant decrease in the level of p62 in the SeV-  
177 infected WT cells but not in the TRAF6 knock-out (KO) MEFs (Fig. 6D).

178

### 179 **TRAF6 associates with Beclin-1 upon RIG-I activation**

180 TRAF6 interacts with Beclin-1 to activate TLR4-mediated autophagy. Thus, we explored the  
181 possible interaction between TRAF6 and Beclin-1 upon RIG-I activation. The interaction  
182 between overexpressed Beclin-1 and endogenous TRAF6 was detected by the co-  
183 immunoprecipitation (co-IP) assay. The interaction increased significantly by the ectopic  
184 expression of RIG-IN (Fig. 7A). The transfection of polyI:C into V5-Beclin-1-expressing  
185 cells, followed by co-IP experiment showed an increase in the interaction of Beclin-1 with  
186 the autophagy initiation complex components, including VPS34, ATG14, and Ambra-1,  
187 indicating that Beclin-1 autophagy initiation complex formation is triggered by RIG-I  
188 activation (Fig. 7B). Furthermore, the co-IP assay showed an association between  
189 endogenous Beclin-1 and TRAF6 upon transfection of polyI:C. This assay also demonstrated  
190 that VPS34 interacted with Beclin-1 upon polyI:C transfection (Fig. 7C). These results  
191 suggest that Beclin-1 associates with VPS34 and TRAF6 to facilitate autophagy upon RIG-I  
192 activation. Thus, we examined whether Beclin-1 migrated to mitochondria upon RIG-I  
193 activation to interact with TRAF6, which can recruit mitochondrial MAVS. As shown in  
194 Figure 7D, the translocation of Beclin-1 to mitochondria was detected in the cells  
195 overexpressing RIG-IN, indicating that Beclin-1 can be recruited to mitochondria upon  
196 activation of RIG-I signaling. Increased localization of Beclin-1 in the mitochondria upon

197 RIG-IN expression or SeV infection was also confirmed by co-localization of Beclin-1 with  
198 mitotracker using confocal microscopy (Figs. 7E and 7F).

199

### 200 **Beclin-1 undergoes K63-linked polyubiquitination upon RIG-I activation**

201 As TRAF6 is an E3-ubiquitin ligase, and K63-linked polyubiquitination of Beclin-1  
202 modulates its function in autophagy, we hypothesized that the interaction between Beclin-1  
203 and TRAF6 might lead to K63-linked polyubiquitination of Beclin-1. Indeed, the  
204 ubiquitination of TRAF6 was increased by the ectopic expression of RIG-IN and further  
205 increased by the treatment with CQ, as determined by IP of the overexpressed TRAF6 and  
206 immunoblotting using an anti-ubiquitin antibody (Figs. 8A and 8B). Immunoblotting using  
207 the K63-linked ubiquitin-specific antibody showed that the K63-ubiquitination of TRAF6  
208 and its interaction with VPS34 were also increased by RIG-IN expression and CQ treatment  
209 (Fig. 8C). PolyI:C transfection also increased the ubiquitination of Beclin-1 within 30 min  
210 (Fig. 8D).

211 To further confirm the K63-linked polyubiquitination of Beclin-1 upon RIG-I activation, we  
212 used a K63-only ubiquitin mutant where all lysines, except K63, were mutated to arginine and  
213 thereby restricting the polyubiquitination to K63. The PolyI:C transfection of HEK293T cells  
214 ectopically expressing the HA-tagged K63-only ubiquitin mutant with Beclin-1 showed  
215 increased K63-linked polyubiquitination of Beclin-1 (Fig. 8E). In addition, the ubiquitination  
216 of endogenous Beclin-1 upon polyI:C transfection was observed by IP and immunoblotting  
217 (Fig. 8F). To determine whether TRAF6 was required for RIG-I-mediated Beclin-1  
218 ubiquitination, the WT and TRAF6 KO MEFs were analyzed. As shown in Figure 8G, there

219 was no significant change in the Beclin-1 ubiquitination level in the TRAF6 KO MEFs upon  
220 SeV infection, whereas, increased ubiquitination was detected in the WT MEFs. Collectively,  
221 these results show that Beclin-1 undergoes K63-linked polyubiquitination upon RIG-I  
222 activation in a TRAF6-dependent manner to facilitate autophagy flux.

223

## 224 **Discussion**

225 In addition to its basal roles in maintaining cellular homeostasis, autophagy has been  
226 implicated in immunity. Autophagy affects the (1) innate and adaptive immune systems by  
227 directly eliminating pathogens, controlling inflammation, and facilitating antigen presentation  
228 and (2) secretion of immune mediators (23). Autophagy is triggered by infection with a diverse  
229 range of viruses suggesting there is crosstalk between the innate immune recognition of viral  
230 infection and the autophagy pathway (23). Recent studies have revealed that the innate  
231 immune sensors, including TLRs and cGAS, can trigger the autophagic process (16, 17).  
232 Regarding RLRs, a deficiency of autophagy augments RIG-I-mediated type-I interferon and  
233 some autophagic proteins, such as the ATG5-ATG12 complex, that inhibit the RIG-I signaling  
234 pathway. This suggests a negative regulatory role of autophagy in the RIG-I-mediated  
235 signaling pathway (21-24). Recent studies have showed that polyI:C transfection activates  
236 autophagy and MAVS maintains mitochondrial homeostasis via autophagy (25). However, it is  
237 not clear whether RIG-I activation by the recognition of a pathogen-associated molecular  
238 pattern regulates the autophagic process directly.

239 The results of the present study provide evidence that RIG-I triggers autophagic flux upon

240 recognition of its ligands. The induction of autophagy following the intracellular introduction  
241 of a synthetic RNA (polyI:C), SeV infection, or forced expression of a constitutively active  
242 form of RIG-I, clearly indicates the importance of RIG-I signaling. Moreover, the RIG-I  
243 ligands failed to induce autophagy in cells defective in RIG-I signaling. The main effect of  
244 RIG-I-mediated antiviral signaling is the production of type-I interferon, which can facilitate  
245 autophagy (26, 27). Surprisingly, activating RIG-I increased autophagy in type-I interferon  
246 signaling-defective cells, indicating that RIG-I signaling-mediated autophagy is independent  
247 from type-I interferon-mediated autophagy.

248 A crucial role of TRAF6 during autophagy induced by the innate immune system has been  
249 shown by several studies. In macrophages, activated CD40 recruits TRAF6 and induces  
250 Beclin-1-dependent autophagy to eliminate infected *Toxoplasma gondii* (28, 29). In addition,  
251 TLR4 signaling requires TRAF6-mediated Beclin-1 ubiquitination to induce autophagy. This  
252 suggests that the recruitment and activation of TRAF6 by innate immune signaling may lead to  
253 the ubiquitination of Beclin-1 and formation of downstream signaling complexes, including  
254 VPS34 (17).

255 Our study using MAVS- and TRAF6-deficient cells has proven the crucial role of the  
256 MAVS-TRAF6 signaling axis in the RIG-I-dependent pathway. We demonstrated that  
257 TRAF6 is required for RIG-I-mediated autophagy, and Beclin-1 is translocated to the  
258 mitochondria, and it interacts with TRAF6 upon RIG-I activation. These data suggest that  
259 RIG-I may share TRAF6-dependent downstream signaling with TLR4 signaling to promote  
260 autophagy. Notably, Beclin-1 interacts simultaneously with VPS34 and TRAF6 upon  
261 polyI:C transfection, suggesting the possible role of TRAF6 in the formation of an active

262 Beclin-1 complex.

263 Several recent studies have showed that the K63-linked polyubiquitination of Beclin-1 is  
264 crucial for autophagy activation and can be targeted by cellular proteins to modulate  
265 autophagy (17, 30, 31). Our data suggest that the TRAF6-mediated K63-polyubiquitination  
266 of Beclin-1 upon RIG-I activation may activate the Beclin1-VPS34 complex to induce  
267 autophagy. In a previous study, Beclin-1 was shown to interact with MAVS to suppress  
268 RIG-I-mediated interferon production in an ATG-5-independent manner (32). Our data  
269 showing the mitochondrial translocation of Beclin-1 upon RIG-I activation suggest that this  
270 may have the dual effect of suppressing the RIG-I interaction with MAVS and inducing  
271 autophagy to negatively regulate RIG-I signaling.

272 Collectively, RIG-I activation leads to Beclin-1 K63-polyubiquitination and mitochondrial  
273 translocation to induce autophagy in a MAVS-TRAF6-dependent manner. Given that  
274 autophagy can suppress RIG-I-mediated interferon production, it seems likely that RIG-I-  
275 induced autophagy serves as a negative-feedback mechanism to prevent an excessive response.  
276 It would be interesting to examine whether viral components, such as nucleic acids, proteins,  
277 or viral particles in the cytoplasm, can be targeted for the autophagic elimination process upon  
278 RIG-I activation.

279

## 280 **Materials and Methods**

281

### 282 **Cells, viruses, and plasmids**

283 The RIG-I KO and WT MEFs were described previously (33). The MAVS KO and IFNAR

284 KO MEFs were generated from the MAVS KO mice (kindly provided by Dr. Shizuo Akira at  
285 the Osaka University) and IFNAR KO mice (kindly provided by Dr. Heung Kyu Lee at the  
286 Korea Advanced Institute of Science and Technology). The TRAF6 KO MEFs were kindly  
287 provided by Dr. Yoon-Jae Song at the Gachon University. N2a and BV-2 cells were described  
288 previously (34). HEK293T, HEK293A, Raw264.7, Huh7, Huh7.5, Vero and MEF cells were  
289 maintained in Dulbecco's modified Eagle's medium containing 10% fetal bovine serum and  
290 penicillin/streptomycin (100 U/mL). SeV (Cantell strain) was purchased from Charles River  
291 Laboratories. Influenza A virus was prepared and infected as described previously (35).

292

### 293 **Immunoblotting and co-IP**

294 The cells were transfected with the indicated plasmids and treated as described. The cells  
295 were collected and lysed with Triton X-100 lysis buffer (25 mM Tris-HCl, pH 7.5, 150 mM  
296 NaCl, 1 mM EDTA, 0.5% Triton X-100) containing protease inhibitor cocktail (Pierce,  
297 #78430). After centrifugation, the cell lysates were subjected to sodium dodecyl sulfate  
298 polyacrylamide gel electrophoresis (SDS-PAGE), followed by immunoblotting. Primary  
299 antibodies used were as follows: anti-LC3 (Cosmo Bio, #CTB-LC3-1-50), anti-  
300 SQSTM1/P62 (Abcam, #ab56416, Cambridge, UK), anti-phospho-IRF3 (Cell Signaling  
301 Technology, #4947), anti-phospho-NF $\kappa$ B (Cell Signaling Technology, #3031), anti- $\beta$ -actin  
302 (Santa Cruz Biotechnology, #sc-47778, Dallas, TX, USA), anti-ubiquitin P4D1 (Cell  
303 Signaling Technology, #3936), anti-Flag (Sigma-Aldrich, #F7435, Saint Louis, MO, USA),  
304 anti-Beclin-1 (Cell Signaling Technology, #3738), anti-HA (Santa Cruz Biotechnology, #sc-  
305 7392), anti-V5 (Cell Signaling Technology, #13202), anti-K63-linked ubiquitin (Cell

306 Signaling Technology, #5621), anti-VPS34 (Cell Signaling Technology, #4263), anti-  
307 ATG14 (Cell Signaling Technology, #96752), anti-Ambra-1 (Cell Signaling Technology,  
308 #12250), anti-UVRAG (Cell Signaling Technology, #5320), anti-GST (Abcam, #ab19256,  
309 Cambridge, UK), anti-TRAF6 (Cell Signaling Technology, #8028), anti-Cox4 (Santa Cruz  
310 Biotechnology, #133478), anti- $\beta$ -tubulin (Cell Signaling Technology, #2146). For IP, the  
311 clarified cell lysates were incubated with the indicated antibodies for 12 h at 4°C, followed  
312 by further incubation with protein A/G resin for 2 h. For IP Flag-tagged proteins, the cell  
313 lysates were incubated with anti-Flag M2 affinity resin (Sigma-Aldrich, #A2220) or anti-V5  
314 affinity resin (Sigma-Aldrich, #A7345) for 12 h at 4°C. After extensive washing with lysis  
315 buffer, the bound proteins were suspended in 1× sample buffer and analyzed by SDS-PAGE  
316 and immunoblotting.

317

### 318 **Autophagosome staining by Cyto-ID and LC3 antibodies**

319 HEK293T cells were transfected with 2  $\mu$ g polyI:C or infected with SeV at 100 HA units/mL,  
320 and collected after 12 h. Subsequently, Cyto-ID autophagy reagent (Enzo, #ENZ-51031,  
321 Farmingdale, NY, USA) staining was performed according to the instruction of the  
322 manufacturer. Briefly, the cells were washed twice with 1× assay buffer and treated with  
323 diluted Cyto-ID green stain solution. The cells were incubated for 30 min at 37°C, and then  
324 washed and incubated for 20 min with 4% paraformaldehyde. For LC3 staining, the cells  
325 were fixed with 4% paraformaldehyde and permeabilized using 0.1% tritonX-100 buffer.  
326 Then cells were stained with LC3 antibody (Cell Signaling Technology, #3868) for 2 h at  
327 37°C and stained with anti-rabbit IgG FITC reagent. The cells were then washed three times

328 and analyzed by fluorescence microscopy to observe punctated forms of autophagosomes.

329

### 330 **Transmission electron microscopy**

331 HEK293T cells were transfected with 10  $\mu\text{g}$  polyI:C using Lipofectamine 2000, or infected  
332 with SeV at 100 HA units/mL, and incubated for 12 h. The WT and MAVS KO MEF cells  
333 were transfected with polyI:C (10  $\mu\text{g}$ ), pEBG vector (2.5  $\mu\text{g}$ ), or pEBG-RIG-IN (5  $\mu\text{g}$ ) using  
334 Lipofectamine 2000, and further incubated for 12 h. The cells were fixed with 2%  
335 paraformaldehyde and 2.5% glutaraldehyde in 0.1 M phosphate buffer (pH 7.2) at 4°C for 24  
336 h. The cells were then embedded in epoxy resin and polymerized at 38°C for 12 h, followed  
337 by further incubation at 60°C for 48 h. Thin sections, cut using an ultramicrotome (MT-XL,  
338 RMC Products), were collected on a copper grid and stained with 4% lead citrate and  
339 saturated 4% uranyl acetate. The samples were examined at 80 kV with a transmission  
340 electron microscope (JEM-1400Plus, JEOL, Tokyo, Japan) at the Seoul National University  
341 Hospital Medical Research Institute (Seoul, Korea). Double- or single-membrane vesicles  
342 measuring 0.3 to 2.0  $\mu\text{m}$  in diameter were defined as autophagosomes.

343

### 344 **Mitochondria isolation**

345 HEK293T cells ( $1 \times 10^7$ ) were transfected with the pEBG vector or pEBG-RIG-IN and  
346 incubated for 24 h. The cells were washed with phosphate-buffered saline and mitochondria  
347 were isolated using a kit (Thermo Scientific, #89874) according to the instruction of the  
348 manufacturer instructions. The cytosolic and mitochondrial fractions were analyzed by SDS-  
349 PAGE and immunoblotting. Cox4 and  $\beta$ -tubulin served as markers for the cytosolic and



350 mitochondrial fractions, respectively.

351

### 352 **Immunofluorescence staining and confocal microscopy**

353 HEK293A cells were transfected with polyI:C or treated with SeV as described. The cells  
354 were moved to fibronectin-coated confocal dish and incubated for 12 h. The cells were  
355 stained with mitotracker (Thermo Scientific, #M7512, Rockford, IL, USA) according to the  
356 instruction of the manufacturer and fixed with 4% paraformaldehyde for 15 min,  
357 permeabilized using 0.1% tritonX-100 for 10 min and blocked with 5% BSA. The cells were  
358 then stained with the primary and secondary antibodies (Thermo Scientific, #31556),  
359 (Thermo Scientific, #62-6511) according to the instruction of the manufacturer. The  
360 colocalization images were examined under an Olympus FV-1000 confocal microscope.

361

### 362 **Statistical analysis**

363 Data are represented as mean  $\pm$  standard error of the mean (SEM) unless otherwise indicated,  
364 and were analyzed by Student's unpaired two-tailed *t* test using GraphPad Prism 5 software.  
365 A value of  $p < 0.05$  was considered significant.

366

### 367 **Acknowledgments**

368 This work was supported by the Basic Science Research Program grants through the

369 National Research Foundation of Korea (NRF), which was funded by the Ministry of  
370 Science, ICT and Future Planning (NRF-2017R1A2B4005596). This work was also  
371 supported by the Medical Research Center Program through the National Research  
372 Foundation of Korea funded by the Ministry of Science and ICT (NRF-  
373 2017R1A5A201476).

374

## 375 **References**

376

- 377 1. **Levine B, Klionsky DJ.** 2004. Development by self-digestion: molecular mechanisms  
378 and biological functions of autophagy. *Dev Cell* **6**:463-477. 10.1016/S1534-5807(04)00099-1
- 379 2. **Kirkegaard K, Taylor MP, Jackson WT.** 2004. Cellular autophagy: surrender, avoidance and  
380 subversion by microorganisms. *Nat Rev Microbiol* **2**:301-314. 10.1038/nrmicro865
- 381 3. **Levine B.** 2005. Eating oneself and uninvited guests: autophagy-related pathways in cellular  
382 defense. *Cell* **120**:159-162. 10.1016/j.cell.2005.01.005
- 383 4. **Jo EK, Yuk JM, Shin DM, Sasakawa C.** 2013. Roles of autophagy in elimination of  
384 intracellular bacterial pathogens. *Front Immunol* **4**:97. 10.3389/fimmu.2013.00097
- 385 5. **Thurston TL, Ryzhakov G, Bloor S, von Muhlinen N, Randow F.** 2009. The TBK1 adaptor  
386 and autophagy receptor NDP52 restricts the proliferation of ubiquitin-coated bacteria. *Nat*  
387 *Immunol* **10**:1215-1221. 10.1038/ni.1800
- 388 6. **Mostowy S, Sancho-Shimizu V, Hamon MA, Simeone R, Brosch R, Johansen T, Cossart**  
389 **P.** 2011. p62 and NDP52 proteins target intracytosolic Shigella and Listeria to different  
390 autophagy pathways. *J Biol Chem* **286**:26987-26995. 10.1074/jbc.M111.223610
- 391 7. **von Muhlinen N, Akutsu M, Ravenhill BJ, Foeglein A, Bloor S, Rutherford TJ, Freund**  
392 **SM, Komander D, Randow F.** 2012. LC3C, bound selectively by a noncanonical LIR motif in  
393 NDP52, is required for antibacterial autophagy. *Mol Cell* **48**:329-342.  
394 10.1016/j.molcel.2012.08.024
- 395 8. **Wild P, Farhan H, McEwan DG, Wagner S, Rogov VV, Brady NR, Richter B, Korac J,**  
396 **Waidmann O, Choudhary C, Dotsch V, Bumann D, Dikic I.** 2011. Phosphorylation of the  
397 autophagy receptor optineurin restricts Salmonella growth. *Science* **333**:228-233.

- 398 10.1126/science.1205405
- 399 9. **Deretic V.** 2012. Autophagy as an innate immunity paradigm: expanding the scope and  
400 repertoire of pattern recognition receptors. *Curr Opin Immunol* **24**:21-31.  
401 10.1016/j.coi.2011.10.006
- 402 10. **Thompson MR, Kaminski JJ, Kurt-Jones EA, Fitzgerald KA.** 2011. Pattern recognition  
403 receptors and the innate immune response to viral infection. *Viruses* **3**:920-940.  
404 10.3390/v3060920
- 405 11. **Chen Q, Sun L, Chen ZJ.** 2016. Regulation and function of the cGAS-STING pathway of  
406 cytosolic DNA sensing. *Nat Immunol* **17**:1142-1149. 10.1038/ni.3558
- 407 12. **Dempsey A, Bowie AG.** 2015. Innate immune recognition of DNA: A recent history. *Virology*  
408 **479-480**:146-152. 10.1016/j.virol.2015.03.013
- 409 13. **Elinav E, Strowig T, Henao-Mejia J, Flavell RA.** 2011. Regulation of the antimicrobial  
410 response by NLR proteins. *Immunity* **34**:665-679. 10.1016/j.immuni.2011.05.007
- 411 14. **Yoneyama M, Fujita T.** 2009. RNA recognition and signal transduction by RIG-I-like  
412 receptors. *Immunol Rev* **227**:54-65. 10.1016/j.immuni.2011.05.007
- 413 15. **Xu Y, Jagannath C, Liu XD, Sharafkhaneh A, Kolodziejaska KE, Eissa NT.** 2007. Toll-like  
414 receptor 4 is a sensor for autophagy associated with innate immunity. *Immunity* **27**:135-144.  
415 10.1016/j.immuni.2007.05.022
- 416 16. **Liang Q, Seo GJ, Choi YJ, Kwak MJ, Ge J, Rodgers MA, Shi M, Leslie BJ, Hopfner KP,**  
417 **Ha T, Oh BH, Jung JU.** 2014. Crosstalk between the cGAS DNA sensor and Beclin-1  
418 autophagy protein shapes innate antimicrobial immune responses. *Cell Host Microbe*  
419 **15**:228-238. 10.1016/j.chom.2014.01.009
- 420 17. **Shi CS, Kehrl JH.** 2010. TRAF6 and A20 regulate lysine 63-linked ubiquitination of Beclin-1  
421 to control TLR4-induced autophagy. *Sci Signal* **3**:ra42. 10.1126/scisignal.2000751
- 422 18. **Saitoh T, Akira S.** 2016. Regulation of inflammasomes by autophagy. *J Allergy Clin Immunol*  
423 **138**:28-36. 10.1016/j.jaci.2016.05.009
- 424 19. **Konno H, Konno K, Barber GN.** 2013. Cyclic dinucleotides trigger ULK1 (ATG1)  
425 phosphorylation of STING to prevent sustained innate immune signaling. *Cell* **155**:688-698.  
426 10.1016/j.cell.2013.09.049
- 427 20. **Levine B, Mizushima N, Virgin HW.** 2011. Autophagy in immunity and inflammation. *Nature*  
428 **469**:323-335. 10.1038/nature09782
- 429 21. **Tal MC, Sasai M, Lee HK, Yordy B, Shadel GS, Iwasaki A.** 2009. Absence of autophagy  
430 results in reactive oxygen species-dependent amplification of RLR signaling. *Proc Natl Acad*  
431 *Sci U S A* **106**:2770-2775. 10.1073/pnas.0807694106
- 432 22. **O'Sullivan TE, Geary CD, Weizman OE, Geiger TL, Rapp M, Dorn GW, 2nd, Overholtzer**

- 433 **M, Sun JC.** 2016. Atg5 Is Essential for the Development and Survival of Innate Lymphocytes.  
434 *Cell Rep* **15**:1910-1919. 10.1016/j.celrep.2016.04.082
- 435 23. **Deretic V, Saitoh T, Akira S.** 2013. Autophagy in infection, inflammation and immunity. *Nat*  
436 *Rev Immunol* **13**:722-737. 10.1038/nri3532
- 437 24. **Jounai N, Takeshita F, Kobiyama K, Sawano A, Miyawaki A, Xin KQ, Ishii KJ, Kawai T,**  
438 **Akira S, Suzuki K, Okuda K.** 2007. The Atg5 Atg12 conjugate associates with innate  
439 antiviral immune responses. *Proc Natl Acad Sci U S A* **104**:14050-14055.  
440 10.1073/pnas.0704014104
- 441 25. **Sun X, Sun L, Zhao Y, Li Y, Lin W, Chen D, Sun Q.** 2016. MAVS maintains mitochondrial  
442 homeostasis via autophagy. *Cell Discov* **2**:16024. 10.1038/celldisc.2016.24
- 443 26. **Schmeisser H, Fey SB, Horowitz J, Fischer ER, Balinsky CA, Miyake K, Bekisz J, Snow**  
444 **AL, Zoon KC.** 2013. Type I interferons induce autophagy in certain human cancer cell lines.  
445 *Autophagy* **9**:683-696. 10.4161/auto.23921
- 446 27. **Dong G, You M, Fan H, Ding L, Sun L, Hou Y.** 2015. STS-1 promotes IFN-alpha induced  
447 autophagy by activating the JAK1-STAT1 signaling pathway in B cells. *Eur J Immunol*  
448 **45**:2377-2388. 10.1002/eji.201445349
- 449 28. **Andrade RM, Wessendarp M, Gubbels MJ, Striepen B, Subauste CS.** 2006. CD40  
450 induces macrophage anti-Toxoplasma gondii activity by triggering autophagy-dependent  
451 fusion of pathogen-containing vacuoles and lysosomes. *J Clin Invest* **116**:2366-2377.  
452 10.1172/JCI28796
- 453 29. **Subauste CS, Andrade RM, Wessendarp M.** 2007. CD40-TRAF6 and autophagy-  
454 dependent anti-microbial activity in macrophages. *Autophagy* **3**:245-248. 10.4161/auto.3717
- 455 30. **Xia P, Wang S, Du Y, Zhao Z, Shi L, Sun L, Huang G, Ye B, Li C, Dai Z, Hou N, Cheng X,**  
456 **Sun Q, Li L, Yang X, Fan Z.** 2013. WASH inhibits autophagy through suppression of Beclin  
457 1 ubiquitination. *EMBO J* **32**:2685-2696. 10.1038/emboj.2013.189
- 458 31. **Xu D, Shan B, Sun H, Xiao J, Zhu K, Xie X, Li X, Liang W, Lu X, Qian L, Yuan J.** 2016.  
459 USP14 regulates autophagy by suppressing K63 ubiquitination of Beclin 1. *Genes Dev*  
460 **30**:1718-1730. 10.1101/gad.285122.116
- 461 32. **Jin S, Tian S, Chen Y, Zhang C, Xie W, Xia X, Cui J, Wang RF.** 2016. USP19 modulates  
462 autophagy and antiviral immune responses by deubiquitinating Beclin-1. *EMBO J* **35**:866-  
463 880.
- 464 33. **Gack MU, Shin YC, Joo CH, Urano T, Liang C, Sun L, Takeuchi O, Akira S, Chen Z,**  
465 **Inoue S, Jung JU.** 2007. TRIM25 RING-finger E3 ubiquitin ligase is essential for RIG-I-  
466 mediated antiviral activity. *Nature* **446**:916-920. 10.15252/embj.201593596
- 467 34. **Kim N, Yoo HS, Ju YJ, Oh MS, Lee KT, Inn KS, Kim NJ, Lee JK.** 2018. Synthetic 3',4'-

- 468 Dihydroxyflavone Exerts Anti-Neuroinflammatory Effects in BV2 Microglia and a Mouse  
469 Model. *Biomol Ther (Seoul)* **26**:210-217. 10.4062/biomolther.2018.008
- 470 35. **Choi MS, Heo J, Yi CM, Ban J, Lee NJ, Lee NR, Kim SW, Kim NJ, Inn KS.** 2016. A novel  
471 p38 mitogen activated protein kinase (MAPK) specific inhibitor suppresses respiratory  
472 syncytial virus and influenza A virus replication by inhibiting virus-induced p38 MAPK  
473 activation. *Biochem Biophys Res Commun* **477**:311-316. 10.1016/j.bbrc.2016.06.111

## 474 **Figure Legends**

475

476 **Figure 1. RIG-I activation invokes autophagy.** (A) HEK293T cells were transfected with  
477 polyI:C (2  $\mu$ g) or infected with Sendai virus (SeV) (200 HA U/mL) for the indicated hours.  
478 The cell lysates were analyzed by immunoblotting using antibodies for LC3, phosphor-IRF3,  
479 and  $\beta$ -actin. (B) HEK293T cells were transfected with polyI:C or infected with SeV as in (A)  
480 and incubated for 12 h. Autophagosomes were labeled with cytoID-green reagent and  
481 observed by fluorescence microscopy. The bottom panels show staining with Hoechst dye to  
482 visualize nuclei of the cells. (C) HEK293T cells were transfected with polyI:C (10  $\mu$ g) or  
483 infected with SeV (200 HA U/mL) for 12 h. The cells were harvested, fixed, and subjected to  
484 transmission electron microscopy to observe autophagic vesicles (black arrows in the lower  
485 panels). The bottom panels show enlarged view of the boxed regions in the top panels. (D)  
486 HEK293T cells were mock-treated, transfected with polyI:C or infected with SeV as in (A).  
487 After washing and fixation, LC3 puncta were visualized by staining with anti-LC3 antibody  
488 and FITC-labeled secondary antibody and observed by fluorescence microscopy. The  
489 number of puncta was counted and analyzed using the image J software. The right panel  
490 shows the mean number of LC3 puncta in a cell. The data are presented as mean  $\pm$  standard

491 error of the mean. (E) HEK293T cells were transfected with polyI:C (2  $\mu$ g) or infected with  
492 SeV (200 HA U/mL) and treated with cycloheximide (CHX, 100 ng/mL) for 0, 4, 8, or 12 h.  
493 The level of p62 was analyzed by immunoblotting. Each experiment was repeated three or  
494 more times.

495

496 **Figure 2. Induction of autophagy by RIG-I in different types of cells.** (A) Raw264.7  
497 murine macrophage cells were transfected with polyI:C (2  $\mu$ g) for the indicated hours. The  
498 cell lysates were analyzed by immunoblotting using antibodies for LC3, phospho-IRF3, and  
499  $\beta$ -actin. (B) Raw264.7 cells were mock-treated, transfected with polyI:C (2  $\mu$ g) or infected  
500 with SeV (200 HAU/ml) for 8 h. After washing and fixation, LC3 puncta were visualized by  
501 staining with anti-LC3 antibody and FITC-labeled secondary antibody and observed by  
502 fluorescence microscopy. (C) N2a murine hypothalamus cells were transfected with polyI:C  
503 (2  $\mu$ g) or infected with Sendai virus (SeV) for 0, 4, or 8 h. The cell lysates were analyzed by  
504 immunoblotting using the indicated antibodies as primary antibodies. (D) BV-2 murine  
505 microglial cells were transfected with polyI:C and incubated for indicated hours. The cell  
506 lysates were analyzed by immunoblotting using indicated antibodies. Each experiment was  
507 repeated three or more times.

508

509 **Figure 3. A constitutively active form of RIG-I triggers autophagy.** (A) HEK293T cells  
510 were transfected with constitutively active N-terminal Card domains of RIG-I (RIG-IN) or

511 MDA5 (MDA5-N). LC3 lipidation was analyzed by immunoblotting using anti-LC3 and  
512 anti- $\beta$ -actin antibodies. (B) HEK293T cells were transfected with vector or RIG-IN and  
513 incubated for 24 h. Autophagosomes were stained with Cyto-ID reagent and observed under  
514 a fluorescence microscope. The bottom panels show staining with Hoechst dye to visualize  
515 nuclei of the cells. (C) HEK293A cells were transfected with RIG-IN or MDA5-N. Eighteen  
516 hours after transfection, the cells were fixed and stained with anti-LC3 antibody and FITC-  
517 labeled secondary antibody and subjected to fluorescence microscopy. The numbers of  
518 puncta was counted and analyzed using the image J software. The right panel shows the  
519 mean number of LC3 puncta in a cell. The data are presented as mean  $\pm$  standard error of the  
520 mean. (D) HEK293T cells were transfected with RIG-IN for 0, 6, 9, 12, and 24 h. The level  
521 of p62 was analyzed by immunoblotting. (E) HEK293T cells were transfected with vector or  
522 RIG-IN for 0 or 24 h with or without chloroquine (CQ) treatment (20  $\mu$ M) for 12 h before  
523 harvest. The cells were subjected to immunoblotting using an anti-LC3 antibody. (F) Type-I  
524 interferon receptor (INFR)-deficient mouse embryonic fibroblast cells were transfected with  
525 2  $\mu$ g polyI:C and incubated for 0, 4, or 8 h. LC3 lipidation was analyzed by immunoblotting.  
526 (G) Vero cells were transfected with 2  $\mu$ g polyI:C or infected with 200 HA U/mL SeV for 0,  
527 4, or 8 h. LC3 lipidation was analyzed by immunoblotting. Each experiment was repeated  
528 three or more times.

529

530 **Figure 4. Functional RIG-I is required for polyI:C and Sendai virus (SeV)-mediated**  
531 **autophagy activation.** (A) Huh7 human hepatoma cells and Huh7-derived Huh7.5 cells with

532 defective RIG-I activity were transfected with 2  $\mu$ g polyI:C. LC3 lipidation was analyzed by  
533 immunoblotting using anti-LC3 and anti- $\beta$ -actin antibodies. (B) Huh7 and Huh7.5 cells were  
534 infected with influenza A PR8 (Flu-PR8) (multiplicity of infection = 1) as indicated, or were  
535 treated with 2  $\mu$ M rapamycin for 24 h. LC3 lipidation was analyzed as in (A). LC3 lipidation  
536 in wild-type (WT) and RIG-I knock-out (KO) mouse embryonic fibroblasts transfected with  
537 2  $\mu$ g polyI:C (C) or infected with 200 HA U/mL SeV (D). LC3 lipidation was analyzed as in  
538 (A). Each experiment was repeated three or more times.

539

540 **Figure 5. Mitochondrial antiviral signaling protein (MAVS) is required for the**  
541 **induction of autophagy.** (A) HEK293T cells were transfected with MAVS and harvested  
542 after 0, 6, and 12 h. LC3 lipidation was analyzed by immunoblotting using an anti-LC3  
543 antibody. (B) The wild-type (WT) and MAVS knockout (KO) mouse embryonic fibroblasts  
544 (MEFs) were transfected with 2  $\mu$ g polyI:C for 0, 4, or 8 h. LC3 lipidation was analyzed by  
545 immunoblotting as in (A). (C) The WT and MAVS KO MEFs were transfected with 2  $\mu$ g  
546 polyI:C for 12 h. The cells were observed by transmission electron microscopy. The bottom  
547 panels show enlarged view of the boxed regions in the top panels. (D) The WT and MAVS  
548 KO MEFs were infected with 200 HA U/mL SeV and treated with cycloheximide (CHX, 100  
549 ng/mL) for 0, 6, or 12 h. The level of p62 was analyzed by immunoblotting. Each experiment  
550 was repeated three or more times.

551



552 **Figure 6. Tumor necrosis factor receptor-associated factor (TRAF)6 is required for the**  
553 **induction of autophagy.** The WT and TRAF6 KO MEFs were transfected with 2  $\mu$ g polyI:C  
554 (A) or infected with 200 HA U/mL SeV (B) for 0, 4, or 8 h. LC3 lipidation was analyzed by  
555 immunoblotting using an anti-LC3 antibody. (C) The TRAF6 WT and KO MEFs were  
556 transfected with polyI:C (2  $\mu$ g/well) or RIG-IN (100 ng/well). Eighteen hours after  
557 transfection, LC3-puncta was visualized by staining with anti-LC3 antibody and FITC-  
558 labeled secondary antibody. The number of puncta was counted and analyzed using the  
559 image J software. The right panel shows the mean number of LC3 puncta in a cell. Data  
560 presented as mean  $\pm$  standard error of the mean. (D) The WT and TRAF6 KO MEFs were  
561 infected with 200 HA U/mL SeV and treated with CHX (100 ng/mL) for 0, 6, or 12 h, then  
562 subjected to immunoblotting using an anti-p62 antibody. Each experiment was repeated three  
563 or more times.

564

565 **Figure 7. RIG-I activation increases the interaction between tumor necrosis factor**  
566 **receptor-associated factor (TRAF)6 and Beclin-1.** (A) HEK293T cells were transfected  
567 with Flag-Beclin-1 (Flag-BECN1) and pEBG (GST) or pEBG-RIG-IN. Thirty-six hours after  
568 transfection, the cell lysates were subjected to co-immunoprecipitation (co-IP) using a M2  
569 anti-Flag antibody-coated resin. The sepharose resin (Sep) served as a negative control.  
570 Whole cell lysates (WCL) and samples from co-IP were analyzed by immunoblotting using  
571 the indicated antibodies. (B) HEK293T cells were transfected with V5-Beclin-1. Twelve  
572 hours after transfection, polyI:C was transfected into the cells at different time points and

573 incubated for the indicated hours. The cell lysates were subjected to co-IP using anti-V5  
574 antibody, followed by immunoblotting using the indicated antibodies. (C) HEK293T cells  
575 were transfected with polyI:C and harvested at 0, 0.5, 1, 2, 4, and 6 h. The cell lysates were  
576 subjected to co-IP with an anti-Beclin-1 (BECN1) antibody and analyzed by immunoblotting  
577 using the indicated antibodies. (D) HEK293T cells were transfected with Flag-BECN1,  
578 pEBG (GST), or pEBG-RIG-IN and incubated for 24 h. The mitochondrial and cytoplasmic  
579 fractions were separated as described in the Materials and Methods and subjected to  
580 immunoblotting using the indicated antibodies. (E) HEK293A cells were transfected with  
581 GST control vector or GST-RIG-IN together with V5-Beclin-1. Eighteen hours after  
582 transfection, the cells were stained with Mitotracker and anti-V5 antibody as described in the  
583 Materials and Methods. Fixed dishes were observed by confocal microscopy. The right panel  
584 shows the intensity of Mitotracker (Red) and Beclin-1 (Green) along the white line of the left  
585 panel images. (F) HEK 293T cells were transfected with V5-Beclin-1. Sixteen hours after  
586 transfection, the cells were mock-infected or infected with SeV for 2h. The localization of  
587 Beclin-1 was analyzed by confocal microscopy as in (E). Each experiment was repeated  
588 three or more times.

589

590 **Figure 8. RIG-I activation increases K63-linked polyubiquitination of Beclin-1.** (A)  
591 HEK293T cells were transfected with Flag-Beclin-1 (Flag-BECN1) and pEBG (GST) or  
592 pEBG-RIG-IN, and incubated for 24 h. The cell lysates were subjected to  
593 immunoprecipitation (IP) using M2 anti-Flag resin and analyzed by immunoblotting using

594 the indicated antibodies. (B) HEK293T cells were transfected with Flag-BECN1 and pEBG-  
595 RIG-IN, and treated with or without 20  $\mu$ M chloroquine (CQ). The cell lysates were  
596 analyzed by IP and immunoblotting as in (A). (C) HEK293T cells were transfected with the  
597 indicated plasmids and incubated in the presence or absence of 20  $\mu$ M CQ for 12 h. Lys63  
598 (K63)-linked polyubiquitination of Beclin-1 was analyzed by IP and immunoblotting with  
599 the indicated antibodies. (D) HEK293T cells were transfected with Flag-Beclin-1. After 24 h,  
600 the cells were transfected with polyI:C and incubated for 0, 0.5, 1, 2, 4, and 6 h. The cell  
601 lysates were analyzed by IP and immunoblotting. (E) HEK293T cells were transfected with  
602 Flag-Beclin-1 and HA-K63-only ubiquitin mutant plasmids. After 24 h, the cells were  
603 transfected with polyI:C and incubated for 0, 3, or 6 h. The cell lysates were analyzed by IP  
604 and immunoblotting. (F) HEK293T cells were transfected with polyI:C and incubated for 0,  
605 2, 4, and 8 h. The cell lysates were subjected to IP using the anti-Beclin-1 (BECN1) antibody  
606 and analyzed by immunoblotting. (G) Wild-type (WT) and TRAF6 knock-out (TRAF6 KO)  
607 MEFs were transfected with Flag-BECN1. After 24 h, the cells were infected with SeV and  
608 incubated for 0, 4, or 8 h. The cell lysates were subjected to IP and immunoblotting. Each  
609 experiment was repeated three or more times.

610

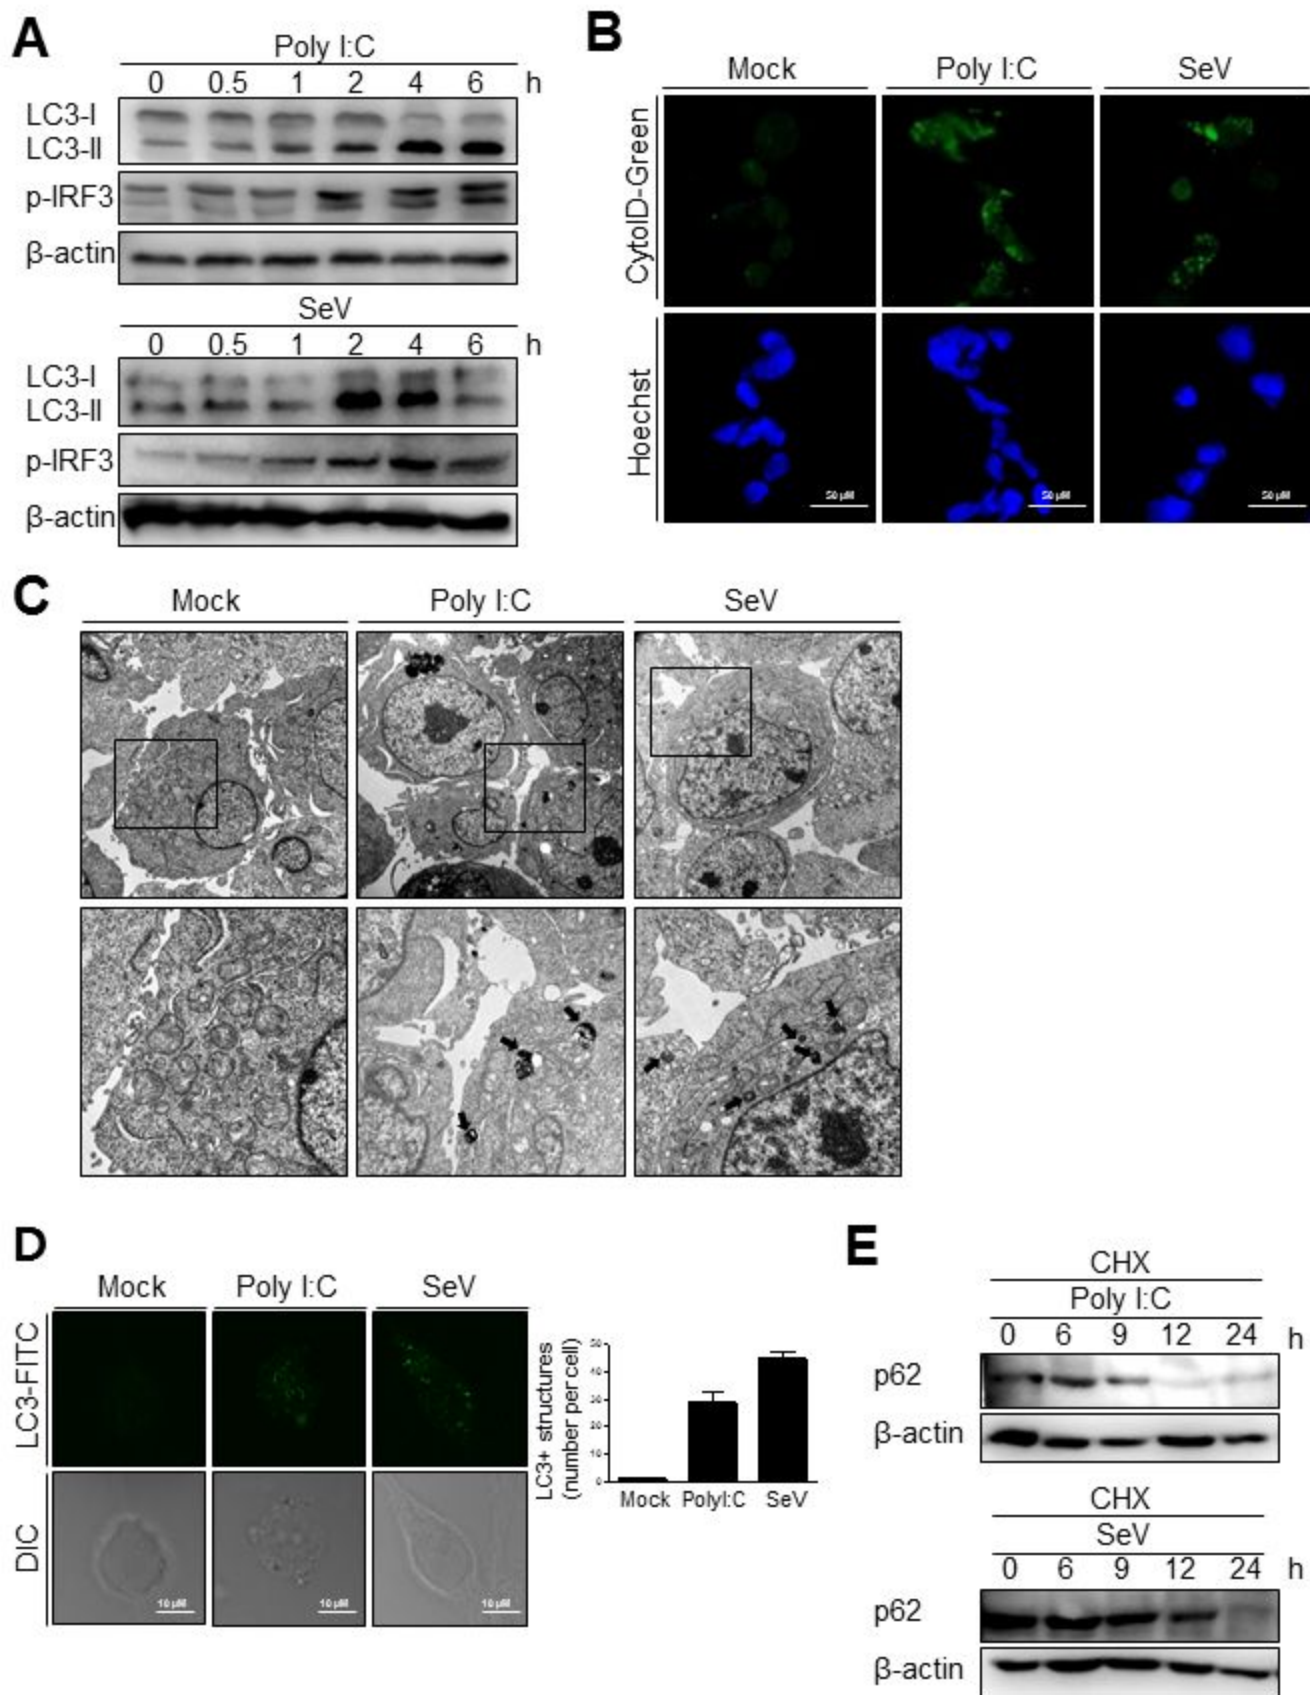

**A**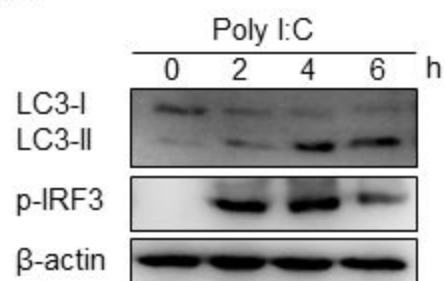**B**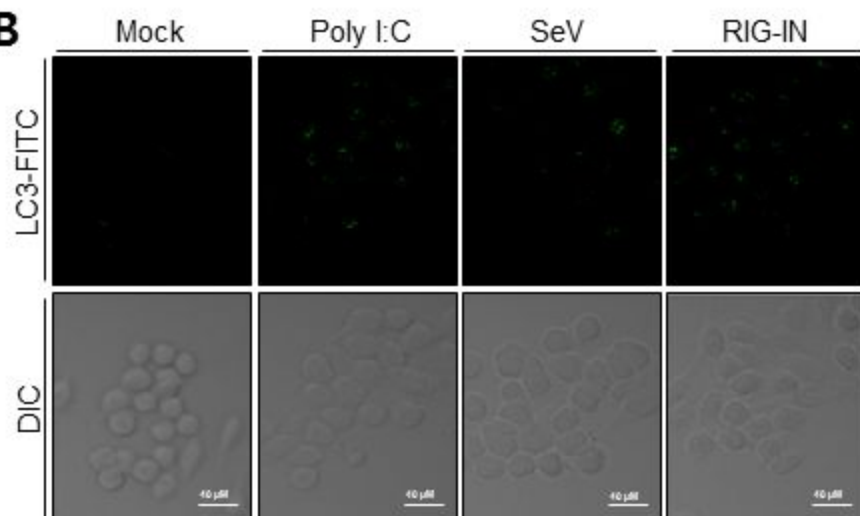**C**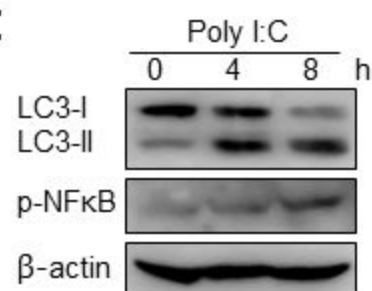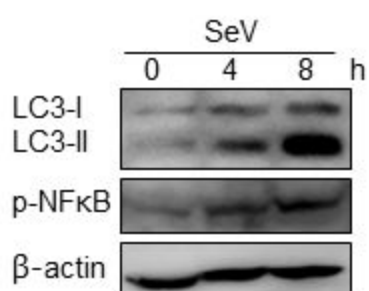**D**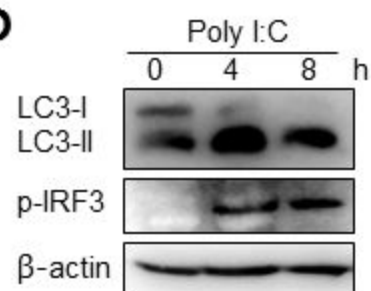

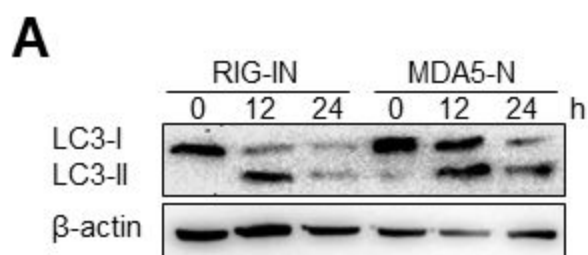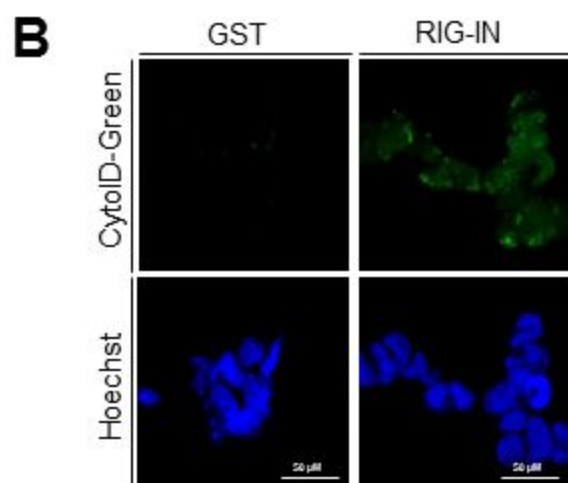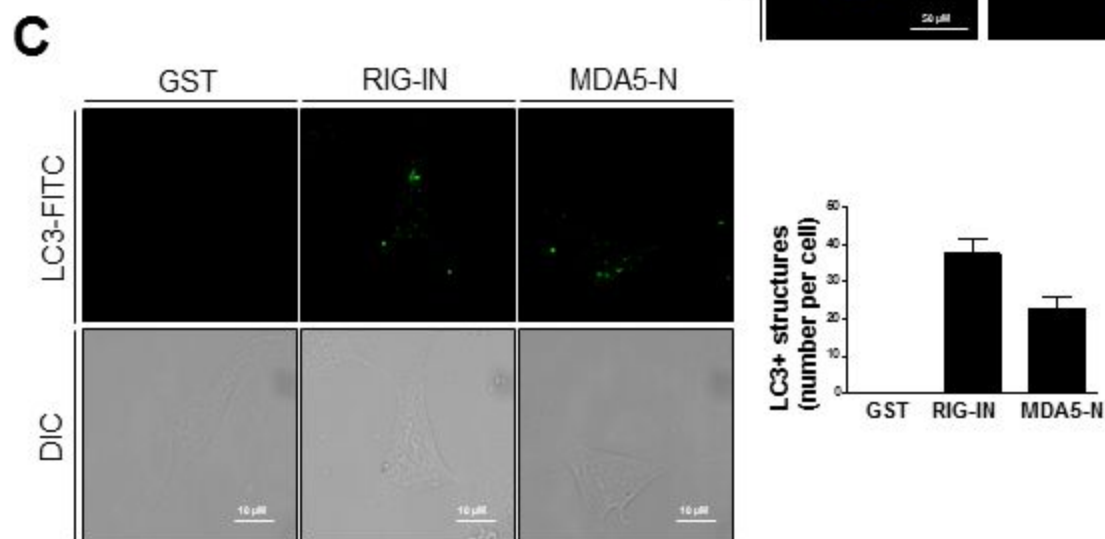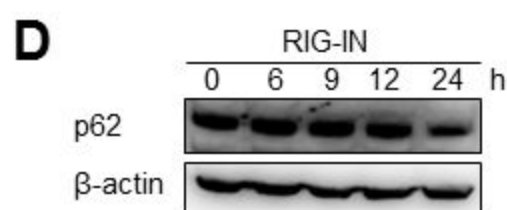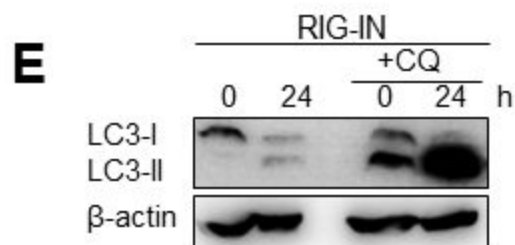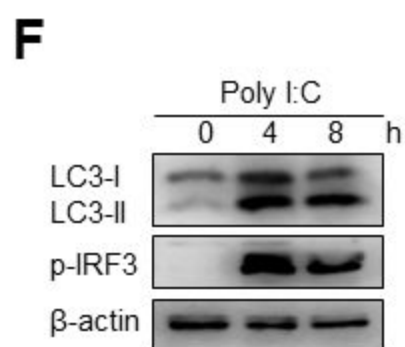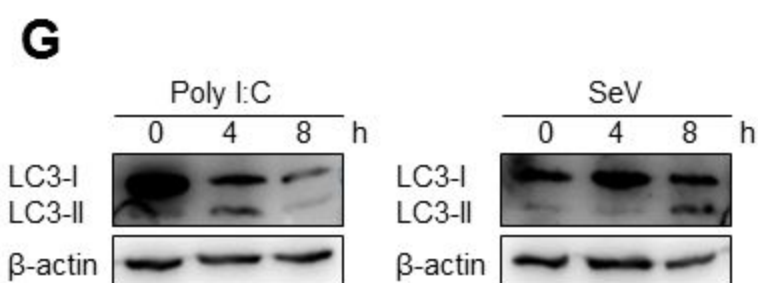

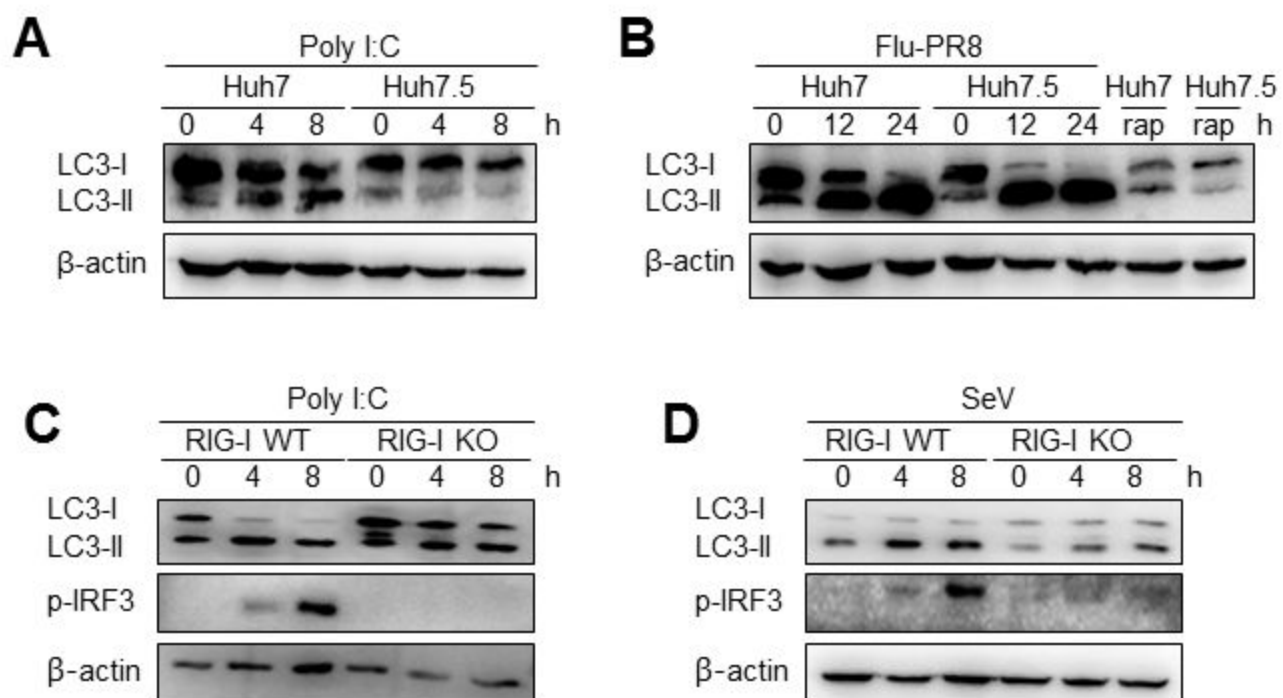

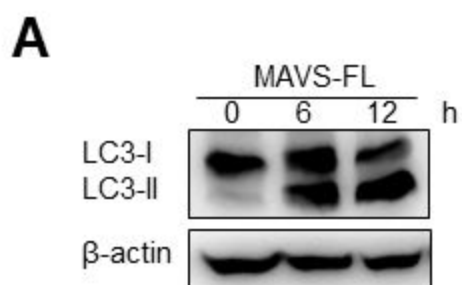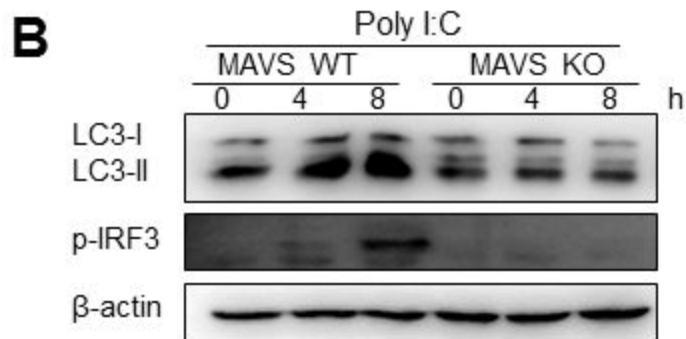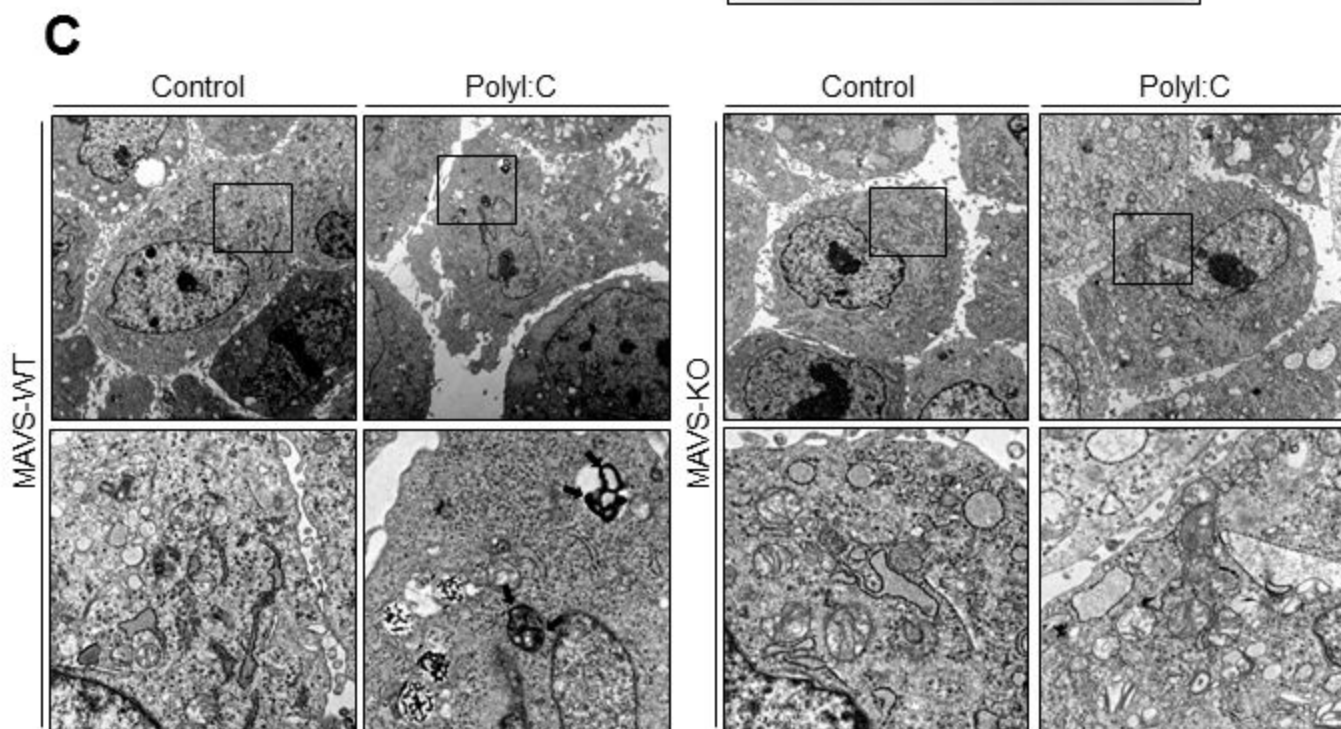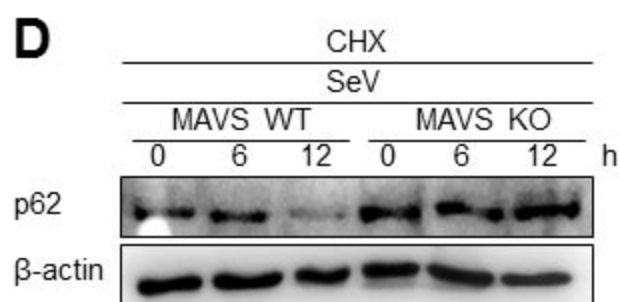



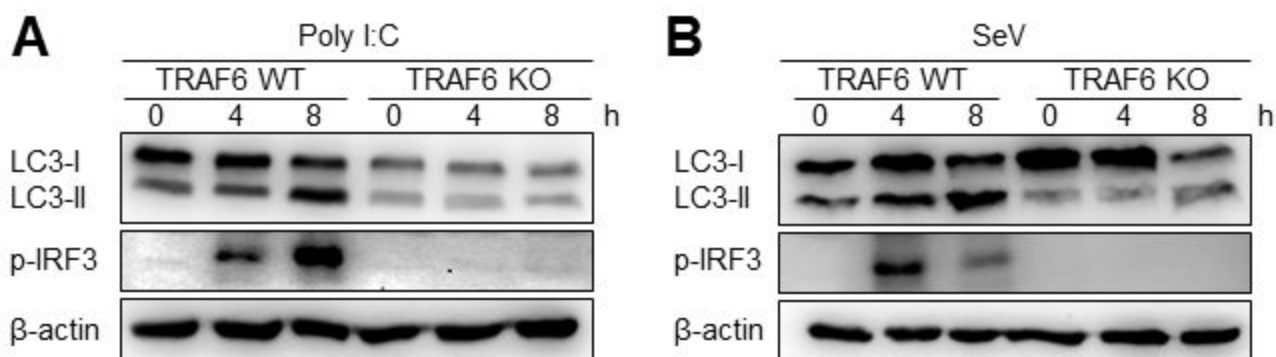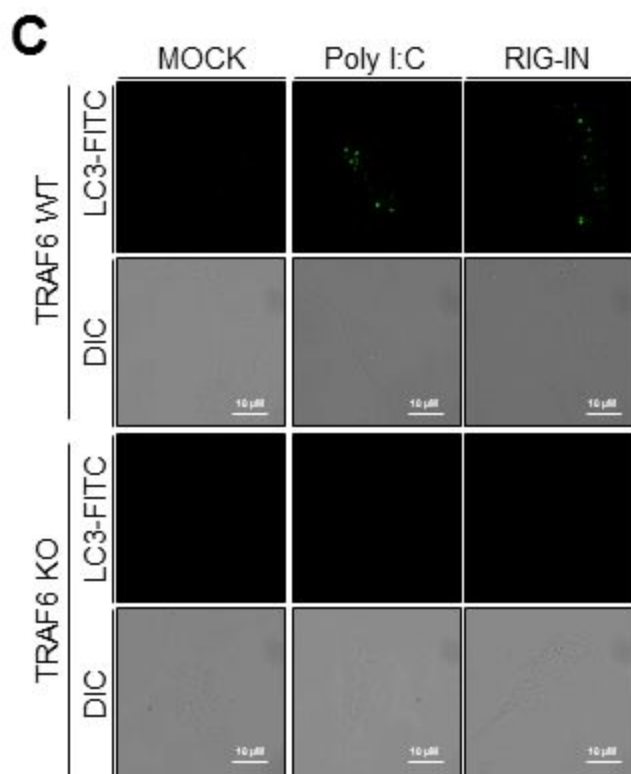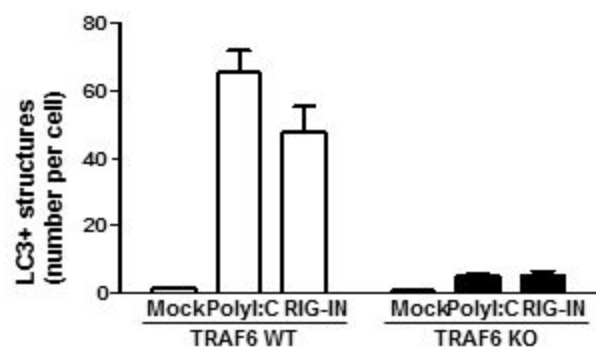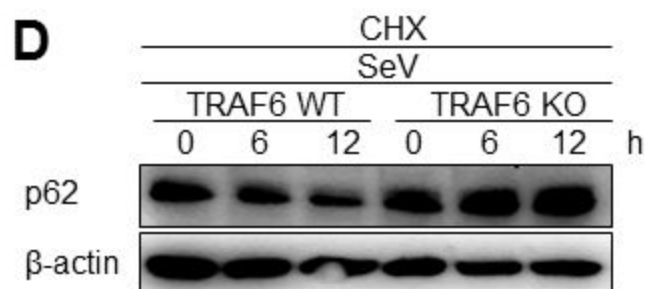

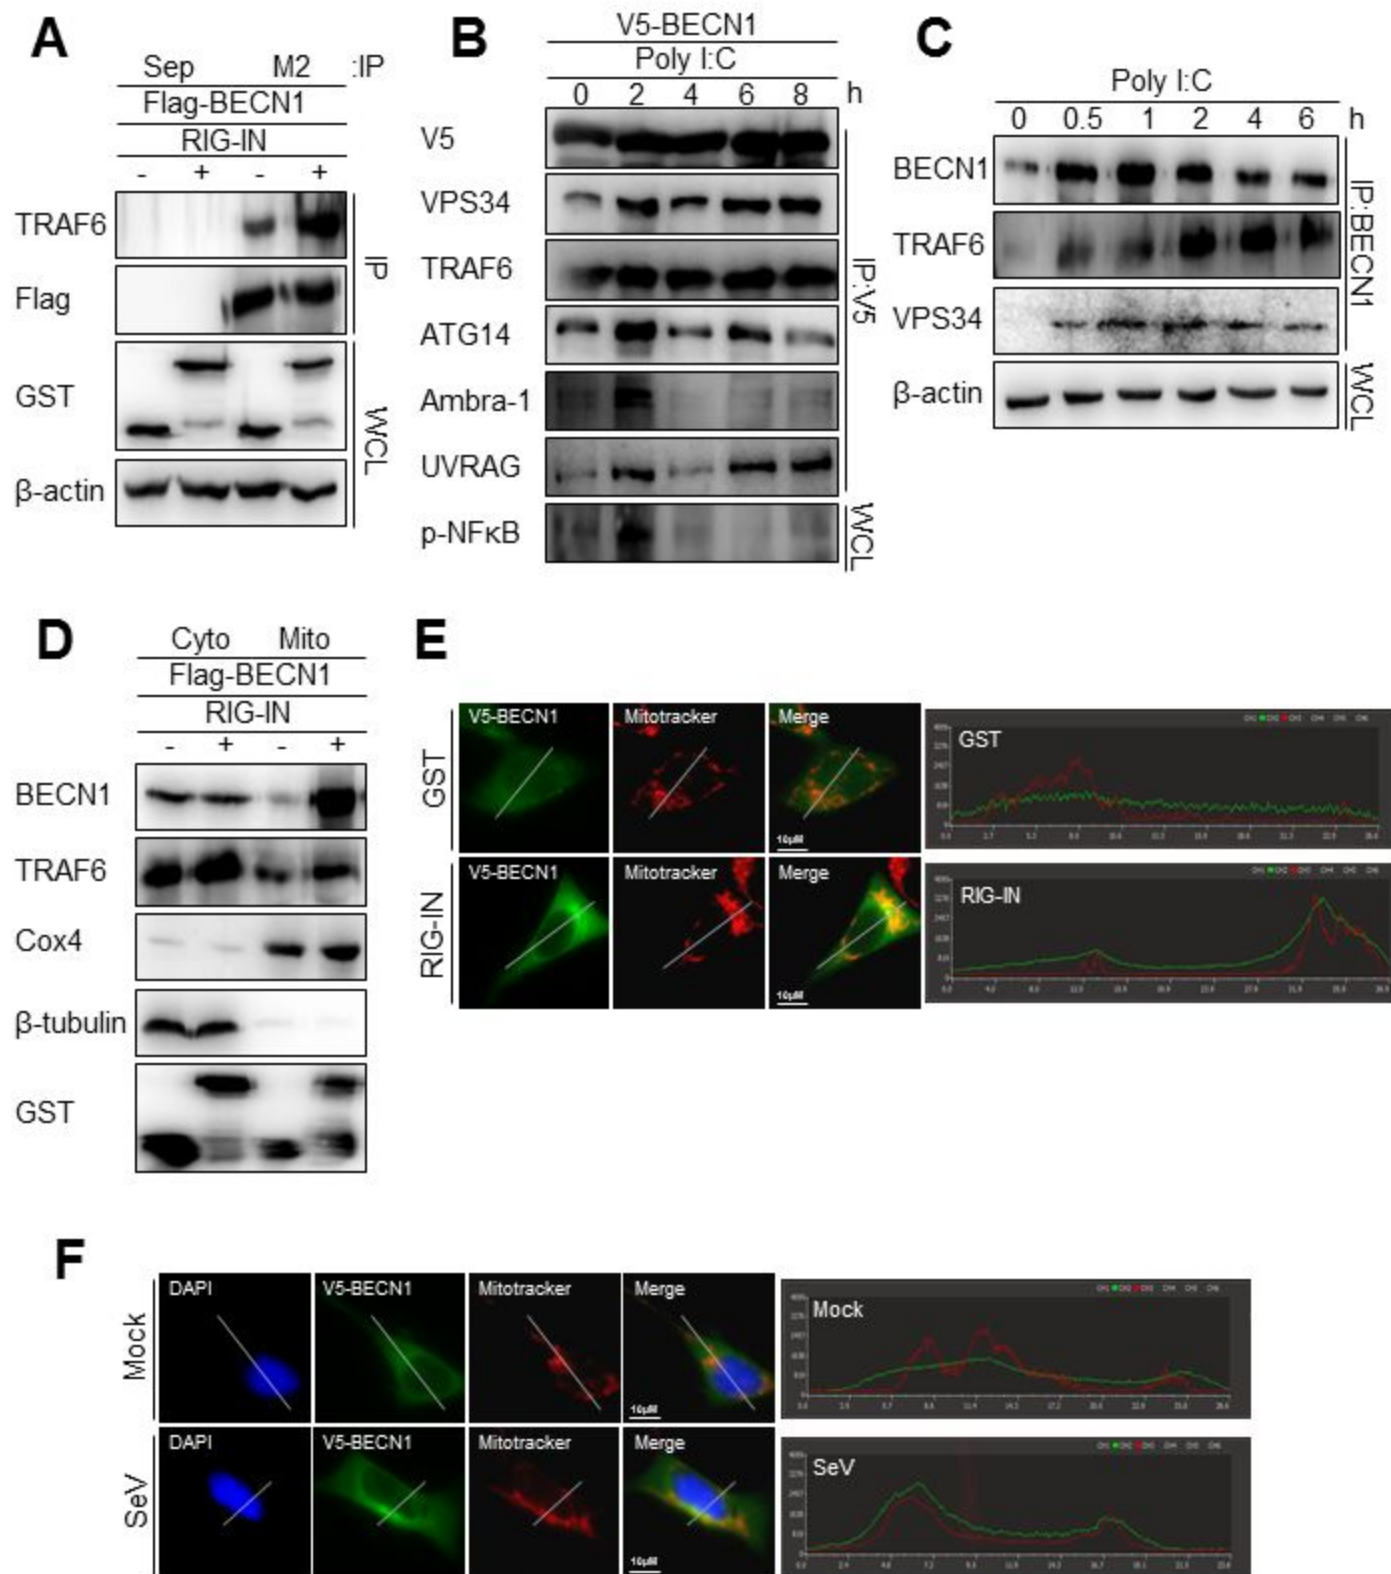

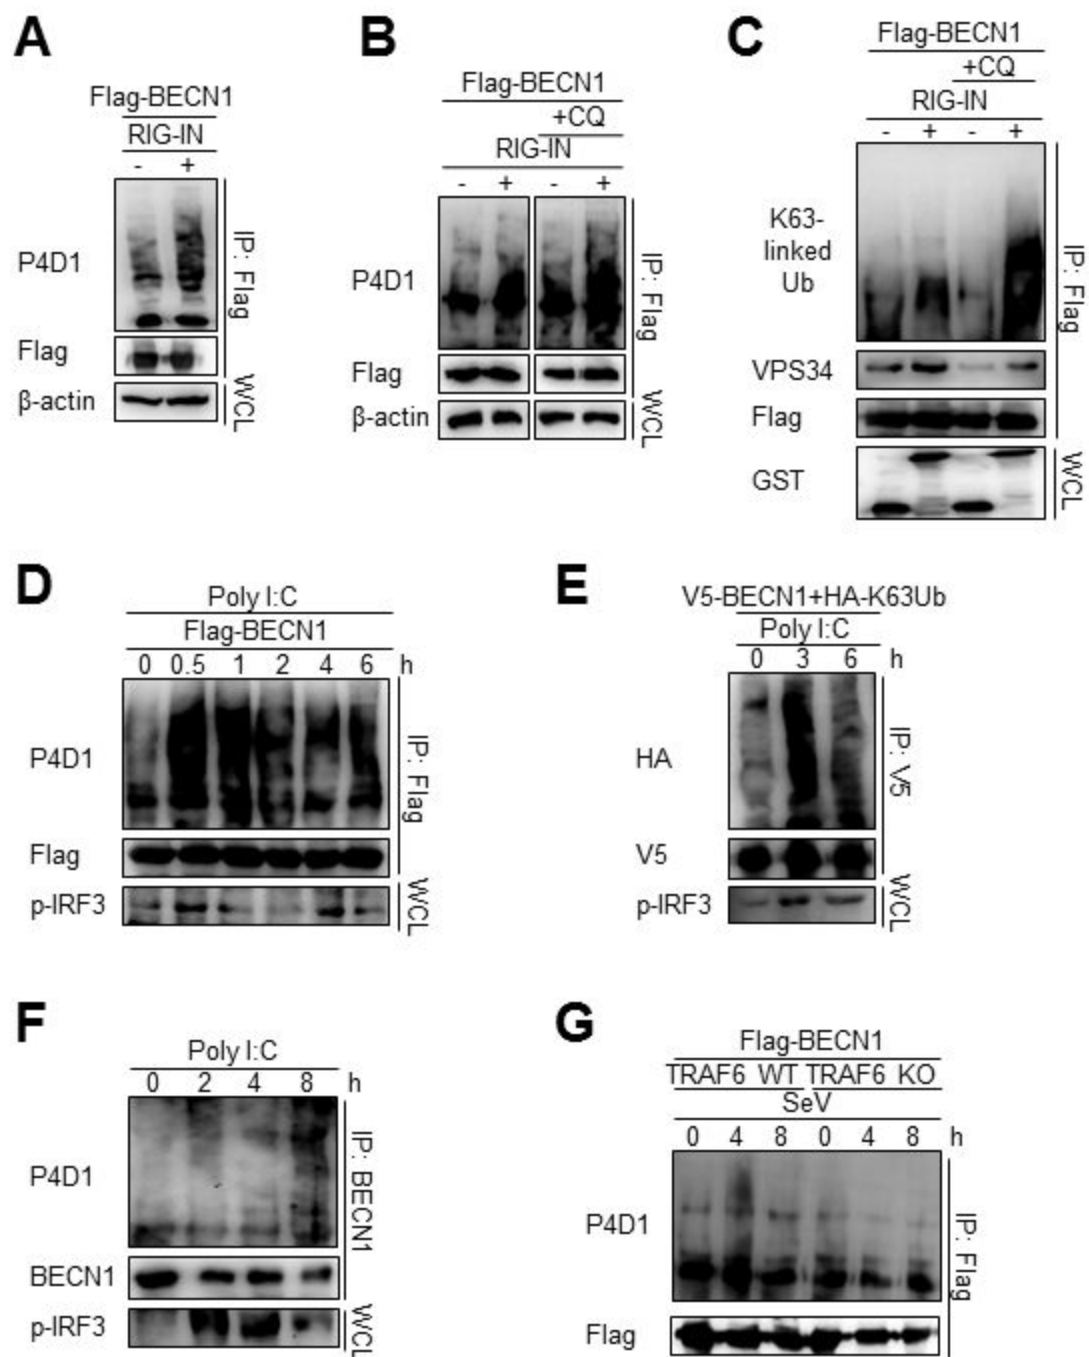

Source: http://biorxiv.org/content/10.1101/340323v1.full.pdf
